# Supplementary material for: Boosting High‐Rate Li–S Batteries by an MOF‐Derived Catalytic Electrode with a Layer‐by‐Layer Structure
Source: PubMed Central journal article supplement (PMC6702624; doi:10.1002/advs.201802362), 2019-07-15
Supplement: ADVS-6-1802362-s001.pdf [file ADVS-6-1802362-s001.pdf]

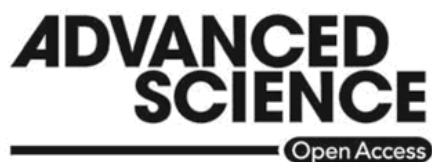

## Supporting Information

for *Adv. Sci.*, DOI: 10.1002/advs.201802362

**Boosting High-Rate Li–S Batteries by an MOF-Derived  
Catalytic Electrode with a Layer-by-Layer Structure**

*Wanlong Li, Ji Qian, Teng Zhao, Yusheng Ye, Yi Xing,  
Yongxin Huang, Lei Wei, Nanxiang Zhang, Nan Chen, Li Li,  
Feng Wu, and Renjie Chen\**

## Supporting Information

### **Boosting high-rate Li-S batteries by a MOFs-derived catalytic electrode with a layered-by-layered structure**

*Wanlong Li, Ji Qian, Teng Zhao, Yusheng Ye, Yi Xing, Yongxin Huang, Lei Wei, Nanxiang Zhang, Nan Chen, Li Li, Feng Wu, and Renjie Chen\**

Dr. W. Li, Dr. J. Qian, Dr. T. Zhao, Dr. Y. Ye, Dr. Y. Xing, Dr. Y. Huang, Dr. L. Wei, Dr. N. Zhang, Dr. N. Chen, Prof. L. Li, Prof. F. Wu, Prof. R. Chen  
Beijing Key Laboratory of Environmental Science and Engineering  
School of Material Science and Engineering  
Beijing Institute of Technology  
Beijing 100081, PR China  
E-mail: chenrj@bit.edu.cn  
Prof. L. Li, Prof. F. Wu, Prof. R. Chen  
Collaborative Innovation Center of Electric Vehicles in Beijing  
Beijing 100081, PR China

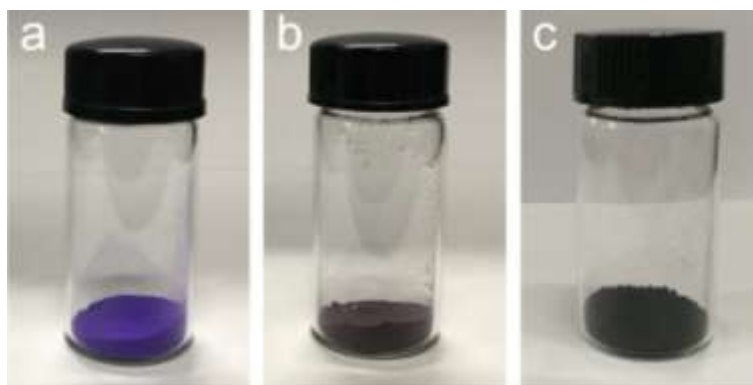

Figure S1. Digital photos of (a) BMZIFs, (b) BMZIFs/GO and (c) CoS<sub>2</sub>-LBLCN.

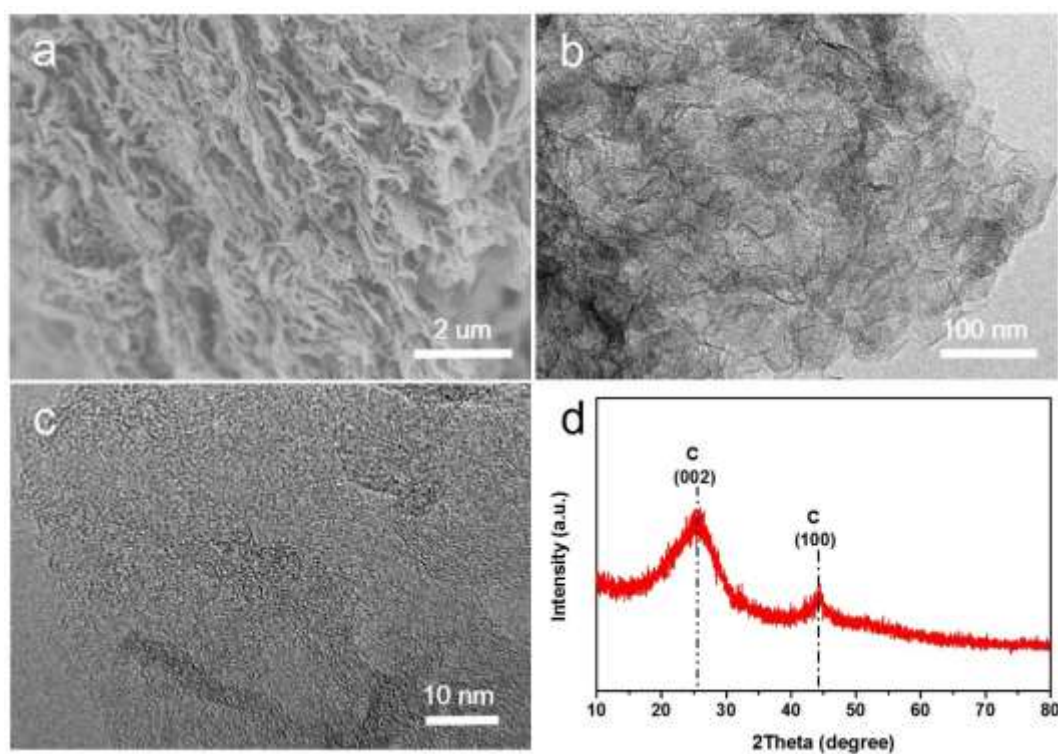

Figure S2. (a) SEM image, (b) TEM image, (c) HRTEM image and (d) XRD pattern of LBLCN.

As shown in Figure S2a, LBLCN shows a 3D layered-by-layered structure, which is similar to CoS<sub>2</sub>-LBLCN. TEM and HRTEM images confirm the porous sheet-like structure of LBLCN without embedded CoS<sub>2</sub> nanoparticles. Figure S2d shows the XRD pattern of

LBLCN, the broad peak around  $26^\circ$  represents the interplane (002) reflection of carbon from rGO and ZIF-8-derived porous carbon.

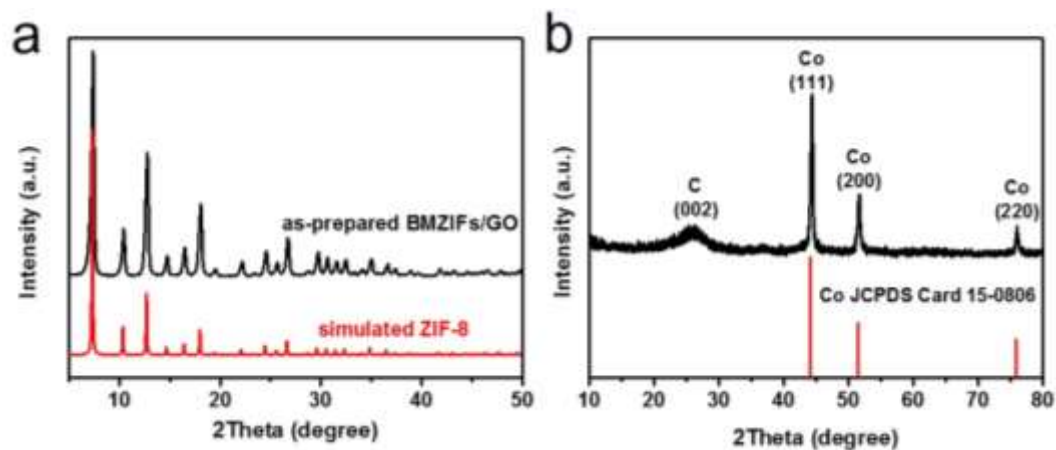

Figure S3. XRD patterns of (a) simulated ZIF-8 and as-prepared BMZIFs/GO and (b) Co-LBLCN and metallic Co (JCPDS Card No. 15-0806).

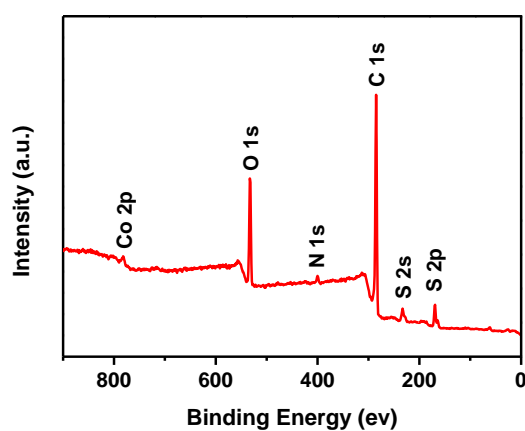

Figure S4. XPS survey spectra of CoS<sub>2</sub>-LBLCN

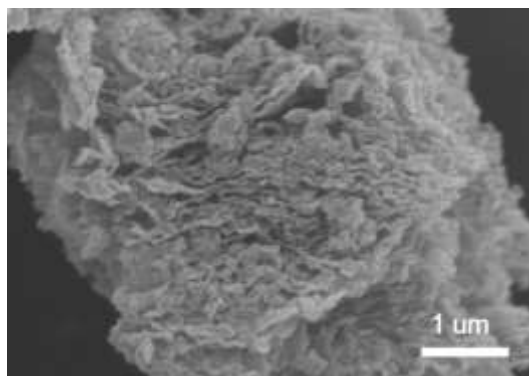

Figure S5. SEM image of S@CoS<sub>2</sub>-LBLCN

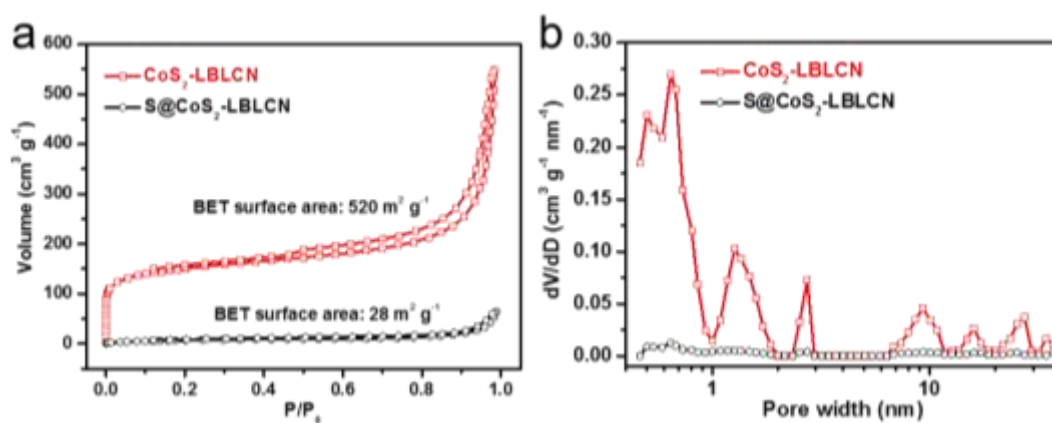

Figure S6. (a) Nitrogen adsorption-desorption isotherms and (b) pore size distributions of CoS<sub>2</sub>-LBLCN and S@CoS<sub>2</sub>-LBLCN.

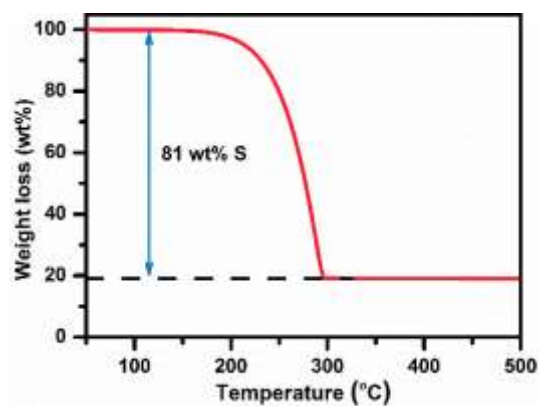

Figure S7. TGA curve of S@CoS<sub>2</sub>-LBLCN

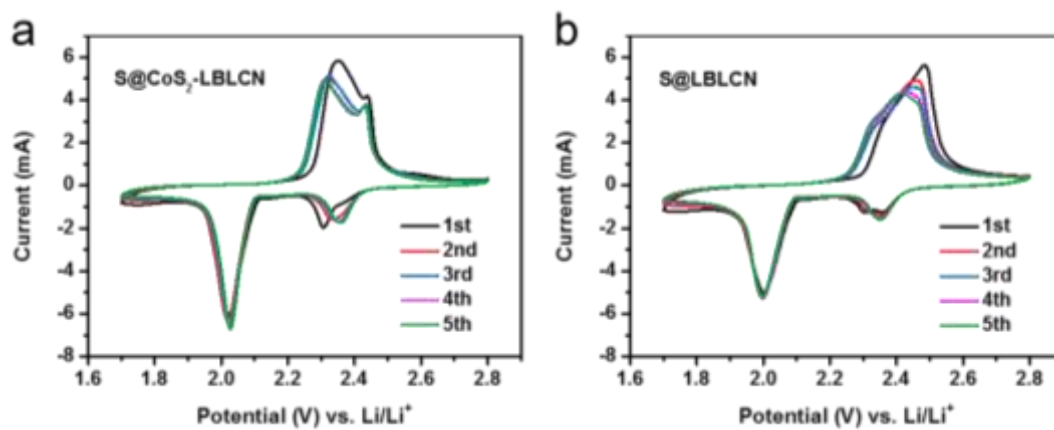

Figure S8 CV profiles of the (a) S@CoS<sub>2</sub>-LBLCN and (b) S@LBLCN cathodes at a scan rate of 0.1 mV s<sup>-1</sup>.

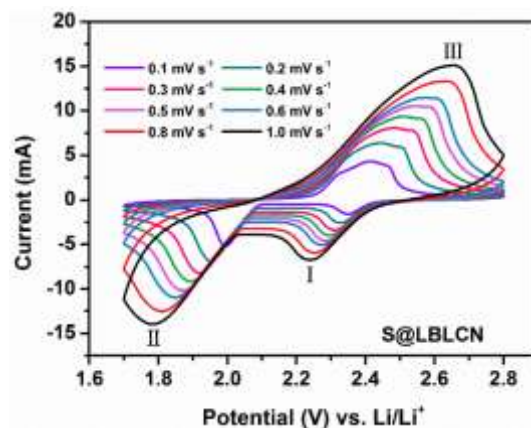

Figure S9 CV profiles of the Li-S cell with S@LBLCN cathode at different scan rates.

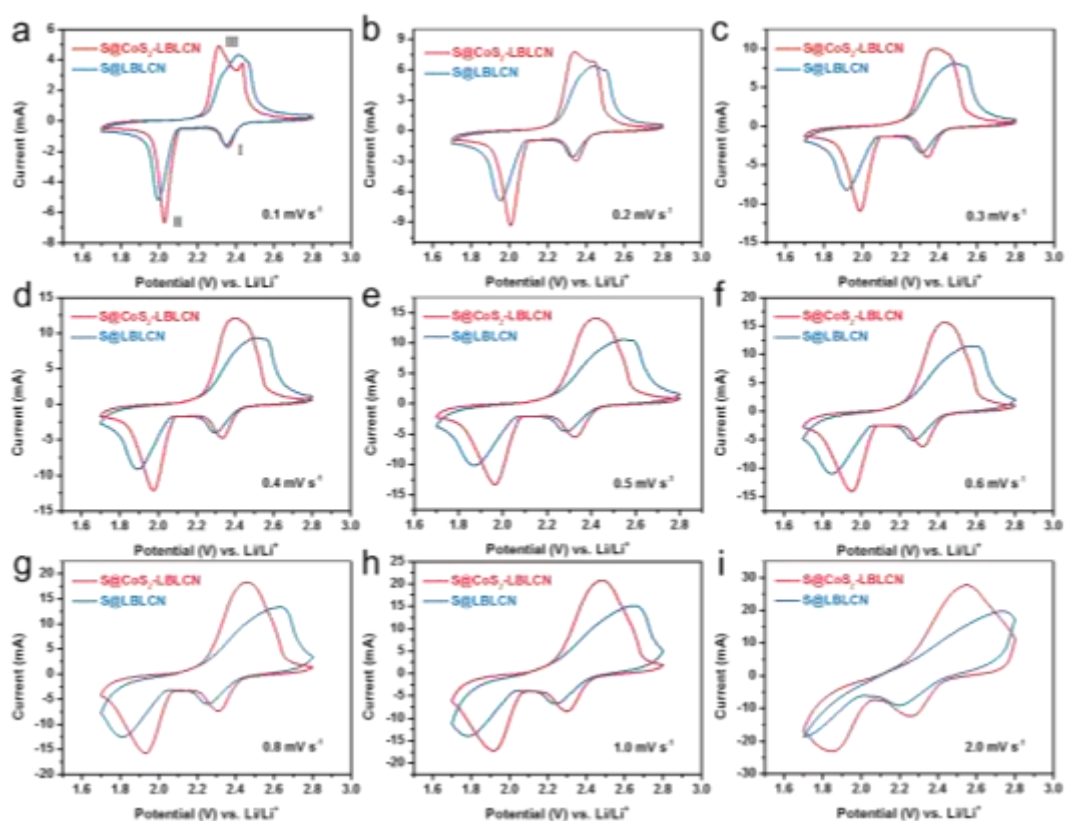

Figure S10 Comparison of CV profiles of S@CoS<sub>2</sub>-LBLCN and S@LBLCN cathodes at different scan rates from 0.1 to 2.0 mV s<sup>-1</sup>.

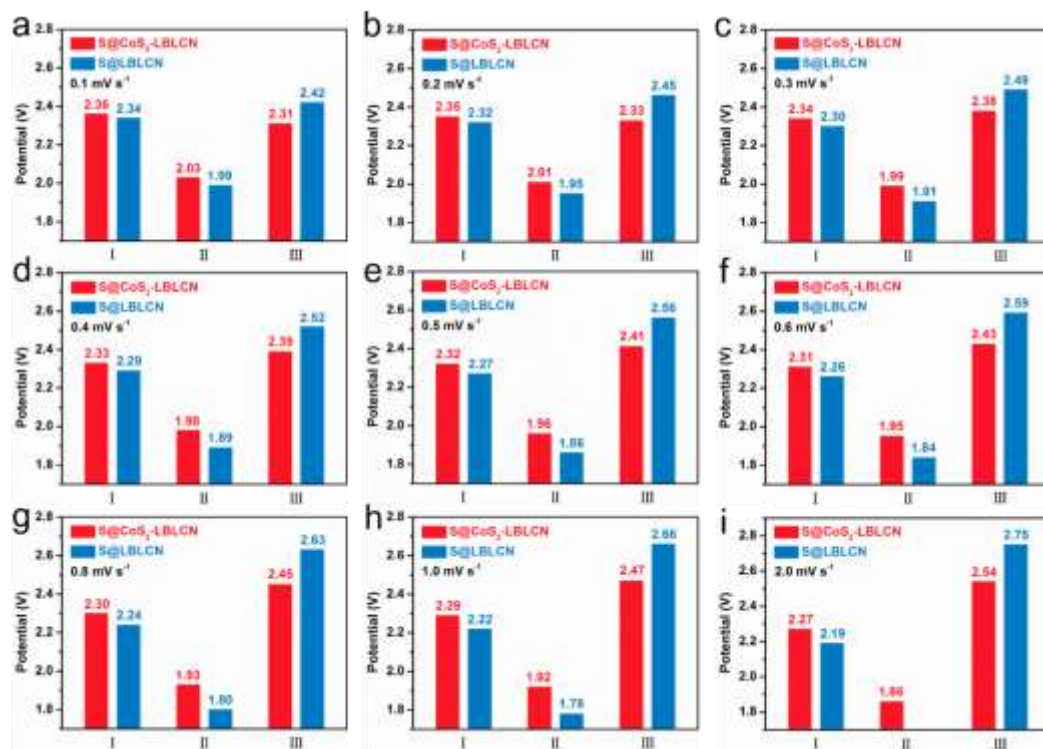

Figure S11 Comparison of corresponding peak voltages of S@CoS<sub>2</sub>-LBLCN and S@LBLCN cathodes at different scan rates from 0.1 to 2.0 mV s<sup>-1</sup>.



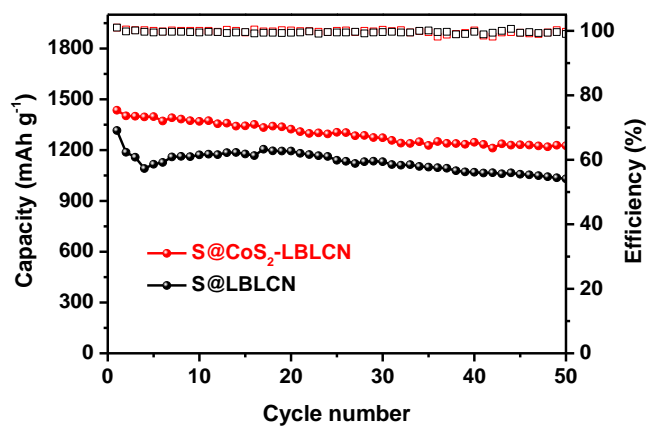

Figure S12 Cycling performances and coulombic efficiencies of S@CoS<sub>2</sub>-LBLCN and S@LBLCN cathodes at 0.2 C.

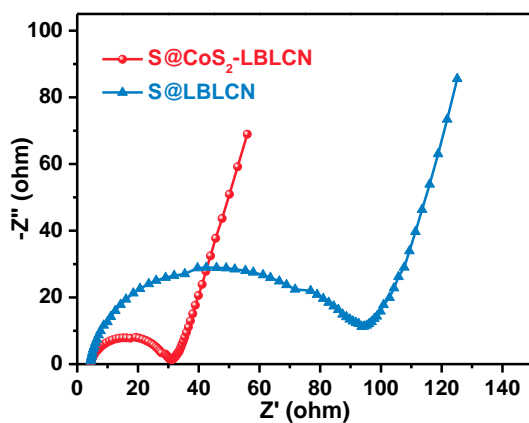

Figure S13 EIS spectra of the S@CoS<sub>2</sub>-LBLCN and S@LBLCN cathodes before cycling.

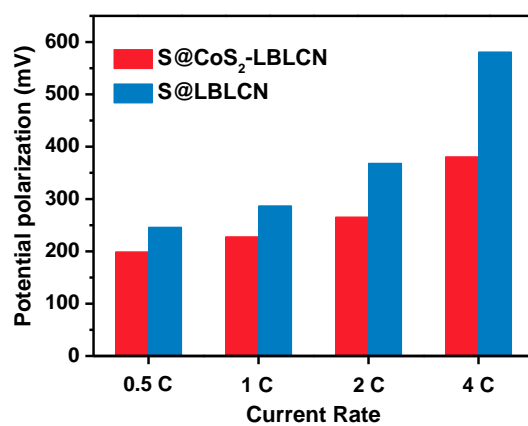

Figure S14 Comparison of the potential polarization between S@CoS<sub>2</sub>-LBLCN and S@LBLCN cathodes at different current rates.

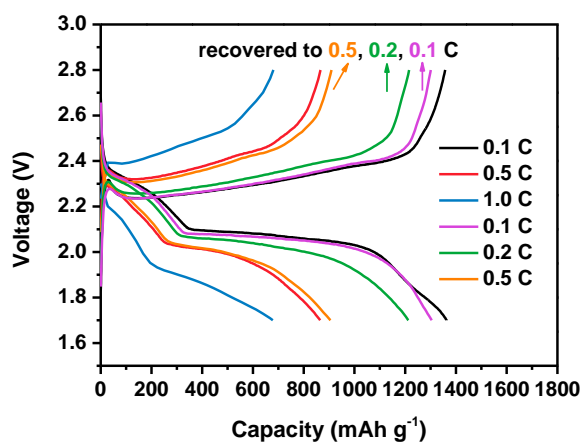

Figure S15 Charge/discharge profiles of S@CoS<sub>2</sub>-LBLCN cathode with sulfur loading of 3 mg cm<sup>-2</sup> at different rates.
